# Supplementary material for: Glycogen synthase kinase‐3 inhibition overcomes epithelial‐mesenchymal transition‐associated resistance to osimertinib in EGFR‐mutant lung cancer
Source: PubMed Central journal article supplement — Cancer Sci. 2020 Jun 11;111(7):2374–84. doi: 10.1111/cas.14454 (PMC7385349; doi:10.1111/cas.14454), 2020-06-11
Supplement: CAS-111-2374-s001.pdf [file CAS-111-2374-s001.pdf]

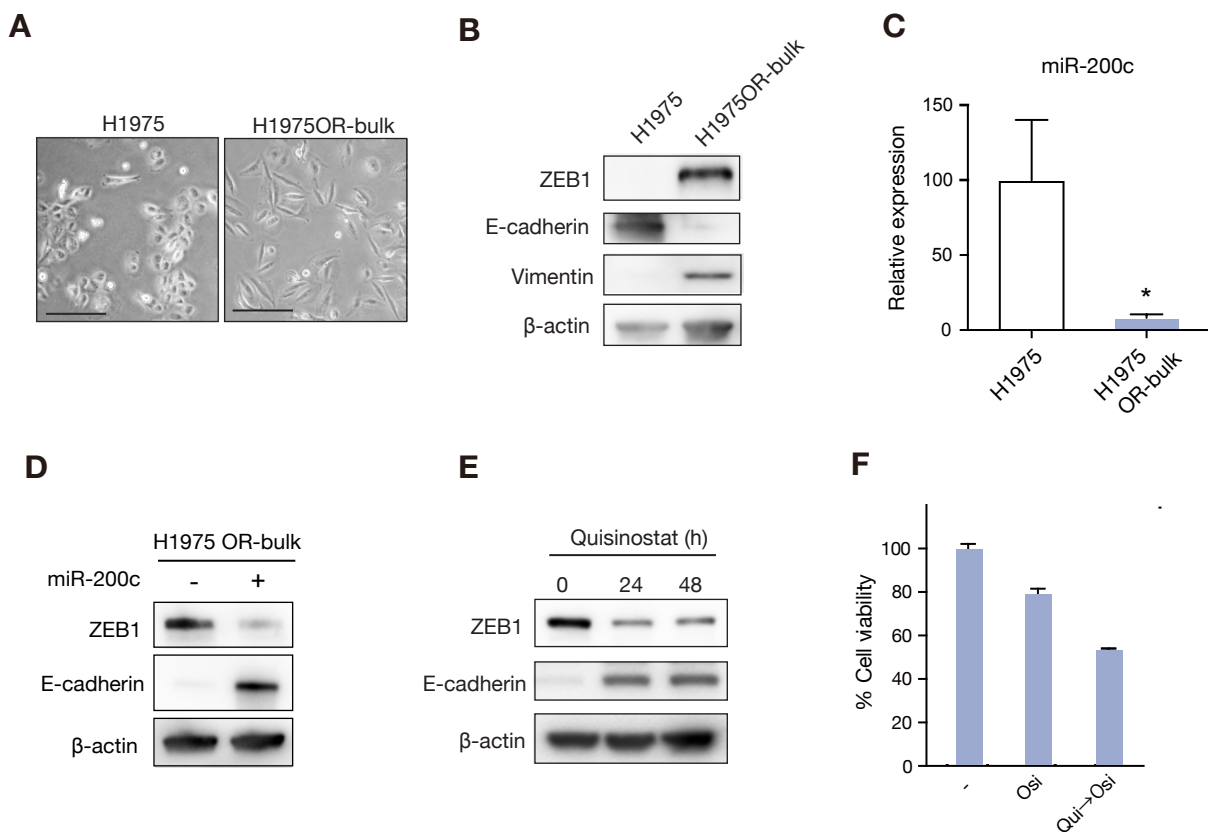

**Figure S1. EMT is induced and quisinostat reverts EMT in the osimertinib resistant H1975-bulk cells.**

(A) H1975 parental and the H1975OR-bulk were evaluated to determine any morphologic changes consistent with EMT using light microscope. Scale bar = 200  $\mu$ m. (B) The expression of EMT markers were analyzed by western blot using the indicated antibodies. (C) Relative expression of miR-200c was measured in H1975 parental and H1975OR-bulk cells (n=3). Error bars represent the SEM and \* indicates p<0.05. (D) H1975-resistant clone cells were treated with miR-200c mimic. The change of ZEB1 and E-cadherin expression were determined by western blot analysis. (E) Change in the expression of ZEB1 and E-cadherin in H1975OR-bulk cells treated with 0.03  $\mu$ M quisinostat was determined by western blot analysis. (E) H1975OR-bulk cells were pre-treated with 0.03  $\mu$ M quisinostat for 48 h, followed by treatment with osimertinib for 72 h. Cell viability was measured using the MTT assay (n=3).

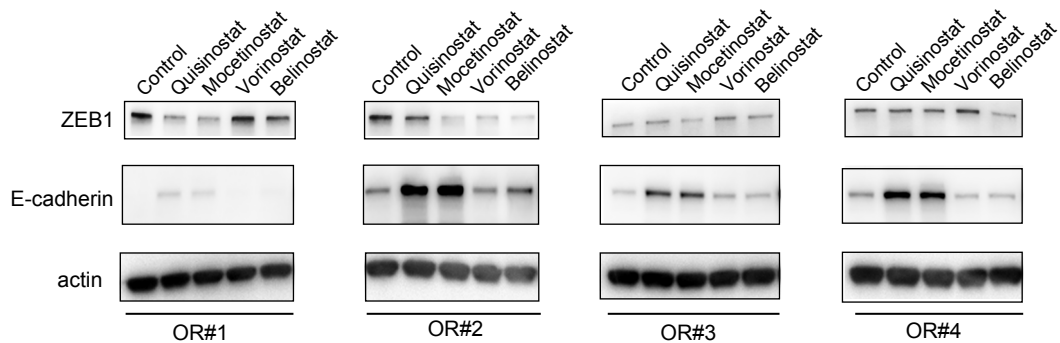

**Figure S2. The effect of HDAC inhibitors on the reversion of EMT in osimertinib-resistant H1975 clones.** The change in the expression of ZEB1 and E-cadherin in the resistant clones treated with 1 $\mu$ M of the HDAC inhibitors were determined by western blot analysis.

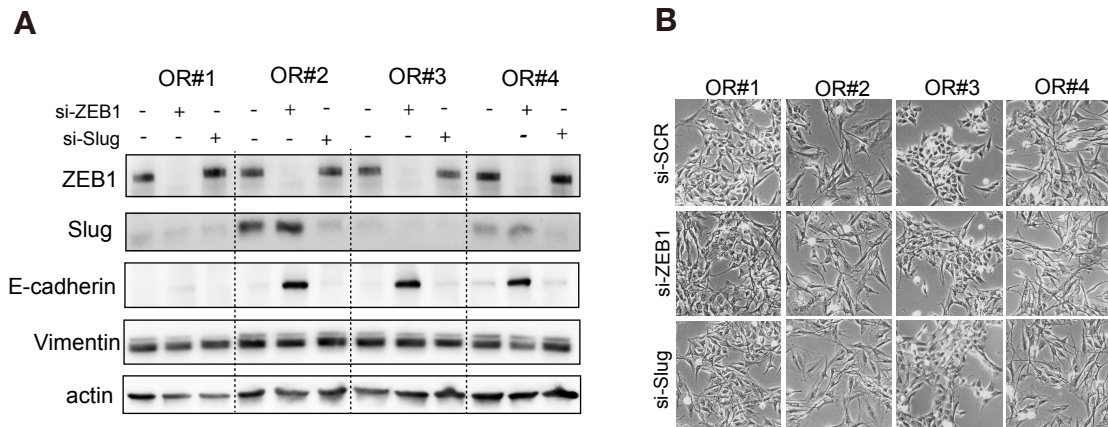

**Figure S3. Effect of silencing of ZEB1 or Slug on the change in EMT.** (A) The change of EMT markers in the resistant clones treated for 72 h with si-ZEB1 or si-Slug was determined by western blot analysis. (B) The change of cell shape in the resistant clones treated with si-ZEB1 or si-Slug for 72h was analyzed by light microscopy.

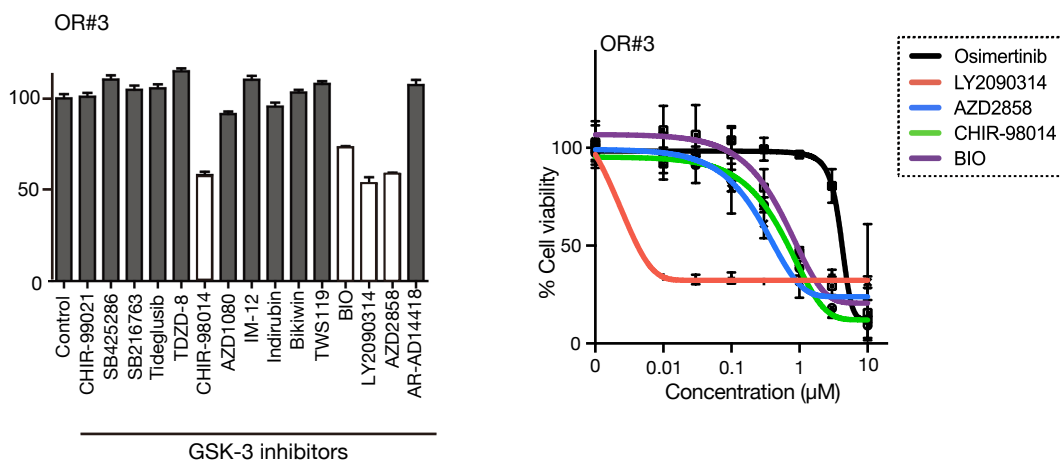

**Figure S4. The effect of GSK-3 inhibitors in H1975-OR#3 cells.** OR#3 cells were treated with 1  $\mu\text{M}$  of the GSK inhibitors for 72h. Cell viability was measured using the MTT assay (n=3) .



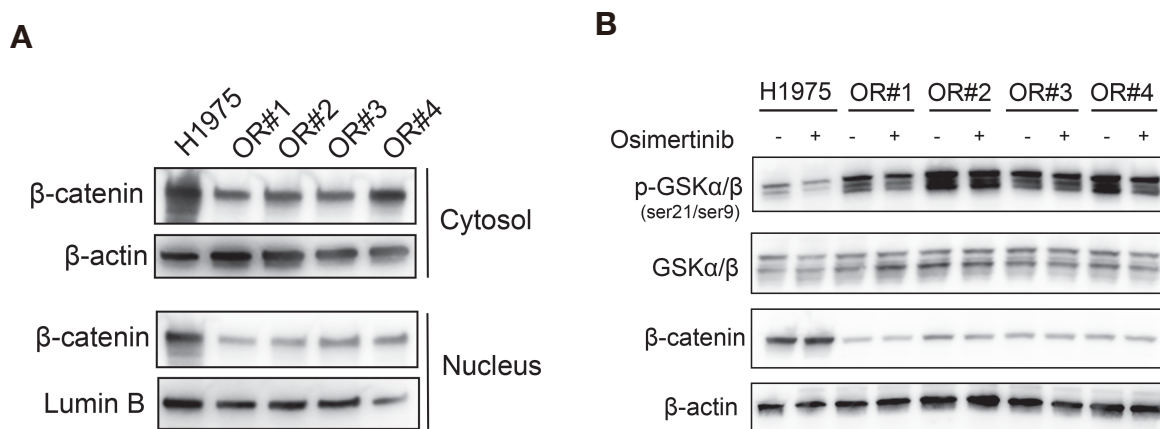

**Figure S5. Wnt/ $\beta$ -catenin signaling pathway is not activated in the osimertinib-reisitant H1975 clones.** (A) The expression of  $\beta$ -catenin in the cytosol and nucleus was determined by western blot analysis. (B) The expression and phosphorylation of GSK $\alpha$ / $\beta$ , and the expression of  $\beta$ -catenin were determined by western blot analysis with the indicated antibodies.
